# Supplementary material
Source: MDPI journal article supplement (https://www.mdpi.com/2673-9976/11/1/7)
Supplement: s1 [file s1]

IECPS  
2021

# The 2nd International Electronic Conference on Plant Science

01-15 DECEMBER 2021 | ONLINE

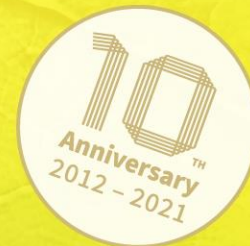

Chaired by **DR. ADRIANO SOFO**

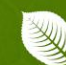

plants

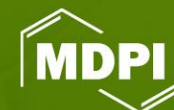

## Effect of *Origanum vulgare* subsp *hirtum* essential oil on metabolite profile of *Solanum tuberosum*

**Milena Nikolova\*, Boryanka Traykova and Strahil Berkov**

Institute of Biodiversity and Ecosystem Research, Bulgarian Academy of Sciences, 23,  
Acad. G. Bonchev str., 1113 Sofia, Bulgaria

\* Corresponding author: [mtihomirova@gmail.com](mailto:mtihomirova@gmail.com)

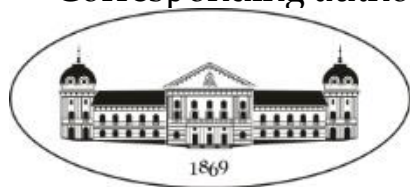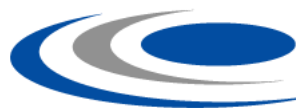

ФОНД  
НАУЧНИ  
ИЗСЛЕДВАНИЯ

МИНИСТЕРСТВО НА ОБРАЗОВАНИЕТО И НАУКАТА

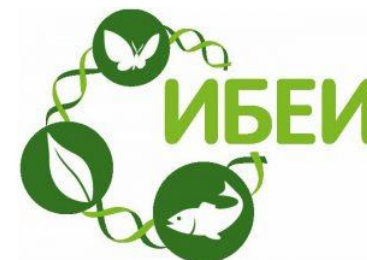

## Abstract:

Metabolic profiles of healthy leaves of control potato plants and leaves with spots formed as a result of processing with aqueous solutions of *Origanum vulgare* subsp *hirtum* essential oil, were comparatively analyzed. The metabolite analysis was made by GC/MS. Potato plants were treated with concentrations of essential oil - 5 and 10  $\mu\text{L/mL}$ . Metabolites representatives of basic groups of substances - amino acids, organic and phenolic acids, mono- and disaccharides were identified. In the damaged leaves, a higher content of monosaccharides - fructose and glucose, pyroglutamic acid and amino acids – proline, serine, aspartic acid, was found compared to control leaves. A less differences were found in terms of the accumulation of chlorogenic, ferulic and quinic acids, sucrose. The results presented complement the knowledge of a plant reaction to abiotic stress.

**Keywords:** GC/MS; potato; phytotoxic

## Introduction

Essential oils are intensively studied in recent years as promising bio-herbicides [1-4]. A strong inhibitory activity on seed germination and phytotoxic effect on seedling growth of *Trifolium repens*, *Trifolium pratense*, *Matricaria chamomilla* and *Sinapis arvensis*, have been reported for *Origanum vulgare* subsp *hirtum* (Link) Ietsw. essential oil [5-7]. Nevertheless it has also been found that the phytotoxic effect of the same oil is weaker in the treatment of potato plants [6].

Ecometabolomics is a new scientific field that explores metabolites and their shifts in response to abiotic and biotics factors [8,9]. Studies on the effect of pesticides or plant products with phytotoxic effect on the metabolism of the target plants are still insufficient [10-12].

In the present study, the metabolic profiles of healthy leaves of control potato plants and leaves with spots formed as a result of treatment with aqueous solutions of *Origanum vulgare* subsp *hirtum* essential oil, were comparatively analyzed.

## Material and Methods:

### 2.1. Plant material

Aerial parts of *Origanum vulgare* ssp. *hirtum* were collected during the flowering stage from the *ex situ* collection of (IBER), BAS, Bulgaria.

### 2.2. Isolation and GC/MS analysis of essential oil

The essential oil was extracted on a Clevenger apparatus by water distillation. The composition of EO was analyzed by GC/MS as described by Traykova et al. [13].

### 2.3. Phytotoxic test

The phytotoxicity test was applied to potatoes Soraya cultivar. Per one potato tuber was planted in pots (15 cm in diameter) that were placed in a phytotron room. Potato plants with height of 35-45 cm were sprayed with aqueous solutions of EO with concentrations of 5  $\mu\text{L}$  / mL and 10  $\mu\text{L}$  / mL. Seven days after treatment potato plants was estimated to damages. Leaves from control and treated plants were collected.

### 2.4. Metabolite analysis

50 mg of potato leaves was extracted with 1 mL methanol. 300  $\mu\text{L}$  of the methanolic extract was transferred into glass vial and was evaporated to dryness. The metabolite analysis was made by GC/MS. The dry extract of vials was silylated. The spectra were recorded on a Thermo Scientific Focus GC combined with a Thermo Scientific DSQ mass detector as described previously [14].



## Results and Discussion

### 3.1. Composition of essential oil

The oil was characterized by high concentration of monoterpenoid phenol – carvacrol. p-Cymene and  $\gamma$ -terpinene were detected in significant amounts also.

### 3.2. Phytotoxic test

The results of the phytotoxic test of essential oil on potato plants showed that the vitality of the plants was not disturbed, but a few leaves with white spots (chlorosis) were observed (Figure 2). Synowiec et al. [15] show that some crops may be more resistant to the toxic effects of essential oils than selected weeds.

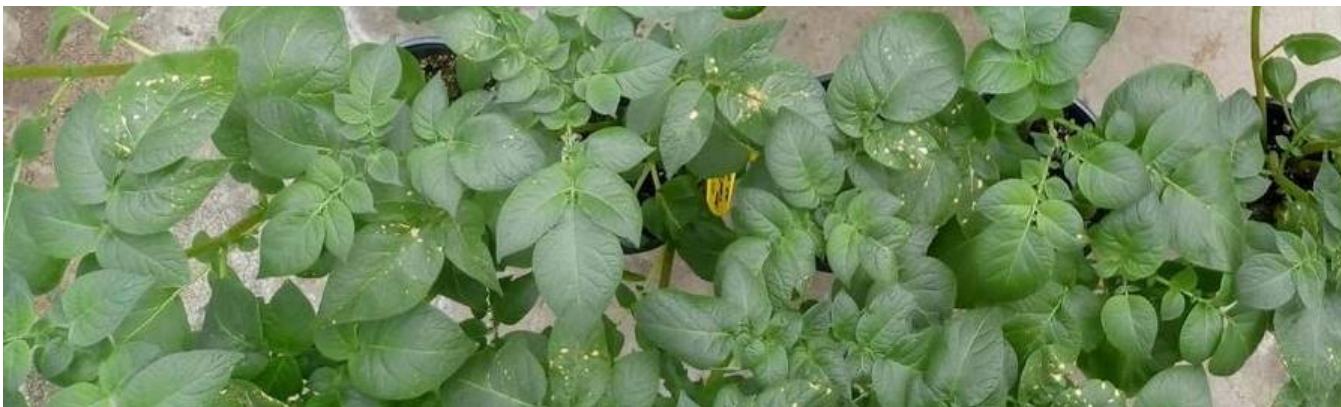

**Figure 1.** Potato plants, seven days after spraying with a solution of essential oil at a concentration of 10  $\mu\text{l/mL}$

# Results and Discussion

## 3.3. Metabolite analysis

Metabolites representatives of basic groups of substances - amino acids, organic and phenolic acids, mono- and disaccharides were identified. In the damaged leaves, a higher content of monosaccharides - fructose and glucose, pyroglutamic acid and amino acids – proline, serine, aspartic acid, was found compared to control leaves. A less differences were found in terms of the accumulation of chlorogenic, ferulic and quinic acids. Relative quantification was based on internal standard added in the beginning of extraction.

Content of some metabolites in the control (untreated) and treated potato plants with 5  $\mu\text{L/mL}$  and 10  $\mu\text{L/mL}$  concentration of oregano essential oil solutions

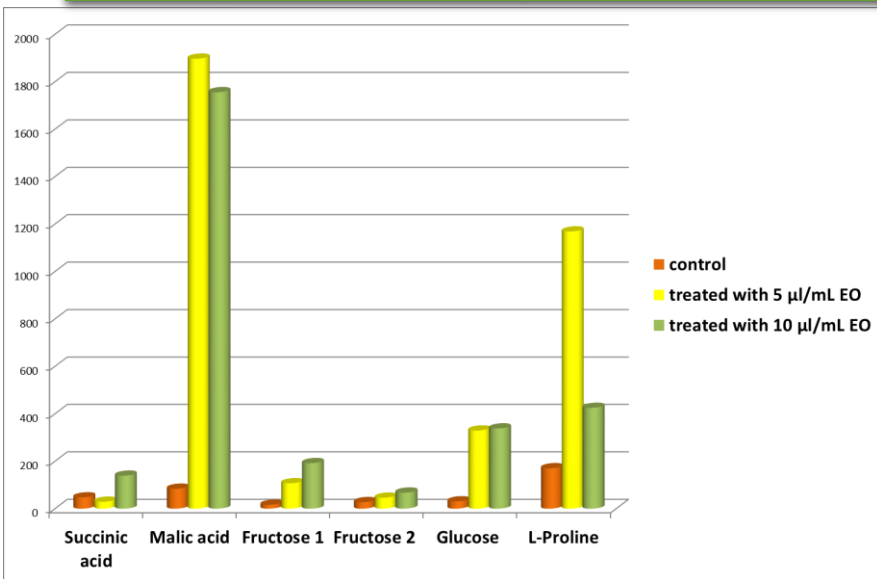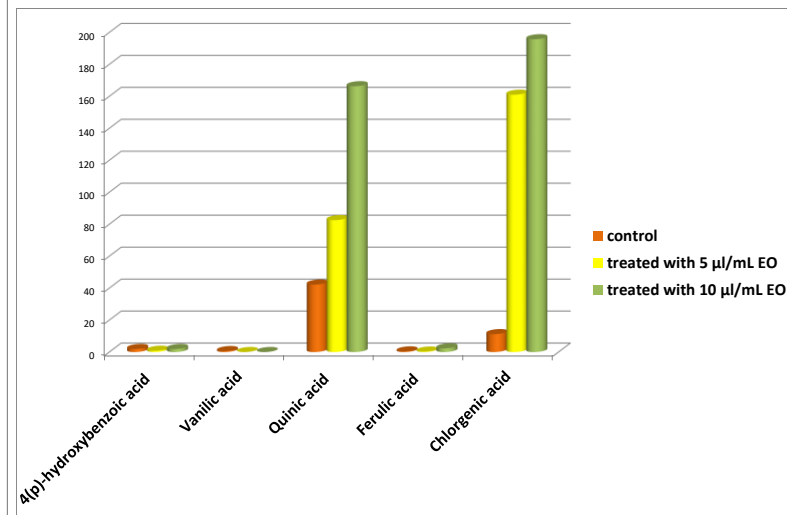

# Conclusion

The present study evaluated the impact of essential oil of *Origanum vulgare* ssp. *hirtum* on potato metabolism. GC/MS analysis revealed that the content of fructose, glucose, malic acid, proline increased in the treated leaves. The accumulation of osmolytes is a common response of plant to abiotic factors such as drought, heavy metal. The results presented complement the knowledge of a plant reaction to abiotic stress.

# References

1. Campiglia E.; Mancinelli, R.; Cavalieri, A.; Caporali, F. Use of essential oils of cinnamon, lavender and peppermint for weed control. *Ital. J. Agron.* **2007**, 2(2): 171-178. DOI: <https://doi.org/10.4081/ija.2007.171>
2. Frabboni, L.; Tarantino, A.; Petruzzini, F.; Disciglio, G. Bio-herbicidal effects of oregano and rosemary essential oils on chamomile (*Matricaria chamomilla* L.) crop in organic farming system. *Agronomy* **2019**, 9, 475. DOI: <https://doi.org/10.3390/agronomy9090475>
3. Nikolova, M.; Berkov, S. Use of essential oils as natural herbicides. *Ecol. Balk.* **2018**, 10, 259-265.
4. Werriet, P.-Y.; Durenne, B.; Delaplace, P.; Fauconnier, M.L. Phytotoxicity of essential oils: opportunities and constraints for the development of biopesticides. A review. *Foods* **2020**, 9, 1291. DOI: <https://doi.org/10.3390/foods9091291>
5. Nikolova M.; Yankova-Tsvetkova E.; Traykova B.; Stefanova T.; Dzheurmanski A.; Aneva I.; Berkov. S. Herbicide potential of selected essential oils of Lamiaceae and Asteraceae. *Acta Agrobot* **2021b**, In press.
6. Nikolova, M.; Yovkova, M.; Yankova-Tsvetkova, E.; Traikova, B.; Stefanova, T.; Aneva, I.; Berkov S. Biocidal activity of *Origanum vulgare* subsp. *hirtum* essential oil. *Acta Univ. Agric. et Silv.* **2021**, In press.
7. Nikolova M.; Traykova B.; Berkov. S. Herbicide effect of Greek oregano essential oil on metabolite profiles of target plants. *Ecol. Balk.* **2021**, 4, 117-124.
8. Sardans, J.; Gargallo-Garriga, A.; Urban, O.; Klem, K.; Walker, T.; Holub, P.; Janssens, I.A.; Peñuelas, J. Ecometabolomics for a better understanding of plant responses and acclimation to abiotic factors linked to global change. *Metabolites* **2020**, 10(6), 239. doi: [10.3390/metabo10060239](https://doi.org/10.3390/metabo10060239)
9. Sardans, J.; Peñuelas, J.; Rivas-Ubach, A. Ecological metabolomics: overview of current developments and future challenges. *Chemoecology* **2011**, 21, 191-225. doi: [10.1007/s00049-011-0083-5](https://doi.org/10.1007/s00049-011-0083-5)
10. Araniti, F.; Landi, M.; Lupini, A.; Sunseri, F.; Guidi, L.; Abenavoli, M. *Origanum vulgare* essential oils inhibit glutamate and aspartate metabolism altering the photorespiratory pathway in *Arabidopsis thaliana* seedlings. *J Plant Physiol* **2018**, 231, 297-309. doi: [10.1016/j.jplph.2018.10.006](https://doi.org/10.1016/j.jplph.2018.10.006)
11. D'Abrosca B, Scognamiglio M, Fiumano V, Esposito A, Choi YH, Verpoorte R, Fiorentino A. Plant bioassay to assess the effects of allelochemicals on the metabolome of the target species *Aegilops geniculata* by an NMR-based approach. *Phytochemistry*, 93: 27-40. doi: 10.1016/j.phytochem.2013.03.016.
12. Scognamiglio, M., Fiumano, V., D'Abrosca, B., Esposito, A., Choi, Y. H., Verpoorte, R., Fiorentino, A., Chemical interactions between plants in Mediterranean vegetation: The influence of selected plant extracts on *Aegilops geniculata* metabolome, *Phytochemistry*, 2014, 106, 69-85, <https://doi.org/10.1016/j.phytochem.2014.07.006>
13. Traykova, B., Stanilova, M., Nikolova, M., Berkov, S. Growth and essential oils of *Salvia officinalis* plants derived from conventional or aeroponic produced seedlings. *Agric. Conspec. Sci.*, **2019**, 84(1), 77-81.
14. Berkov, S., Pechlivanova, D., Denev, R., Nikolova, M., Georgieva L., Sidjimova, B., Bakalov, D., Tafradijska, R., Stoynev, A., Momekov, G., Bastida, J. GC-MS analysis of Amaryllidaceae and Sceletium-type alkaloids in bioactive fractions from *Narcissus* cv. Hawera. *Rapid Commun Mass Spectrom.*, **2021**, 35(14): e9116. <https://doi.org/10.1002/rcm.911>
15. Synowiec, A.; Kalembe, D.; Drozdek, E.; Bocianowski, J. Phytotoxic potential of essential oils from temperate climate plants against the germination of selected weeds and crops. *J Pest Sci*, **2017**, 90(1): 407-419.

**Acknowledgments:** This research was supported by the Bulgarian National Science Fund, Bulgarian Ministry of Education and Science (Grant DN 16/2, 11.12.2017).

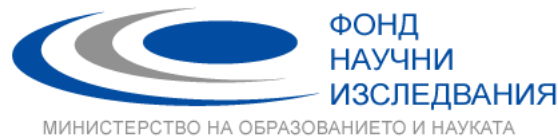

IECPS  
2021
